# Supplementary material for: A novel graphene oxide decorated with halloysite nanotubes (HNTs/GO) composite used for the removal of levofloxacin and ciprofloxacin in a wide pH range
Source: Royal Society of Chemistry journal article supplement (doi:10.1039/d1nj03807a), 2021-01-01
Supplement: d1nj03807a1.pdf [file d1nj03807a1.pdf]

## Supplementary Material

### **A novel graphene oxide decorated with halloysite nanotubes (HNTs/GO) composite used for removal of levofloxacin and ciprofloxacin in a wide pH range**

Qihui Wang, Min Yang, Xiaodan Qi, Jiexue Wang, Kang Sun, Zhonghui Li\*, Guowei  
Deng\*

College of Chemistry and Life Science, Sichuan Provincial Key Laboratory for Structural Optimization and Application of Functional Molecules, Chengdu Normal University, Chengdu, 611130, China.

## Content

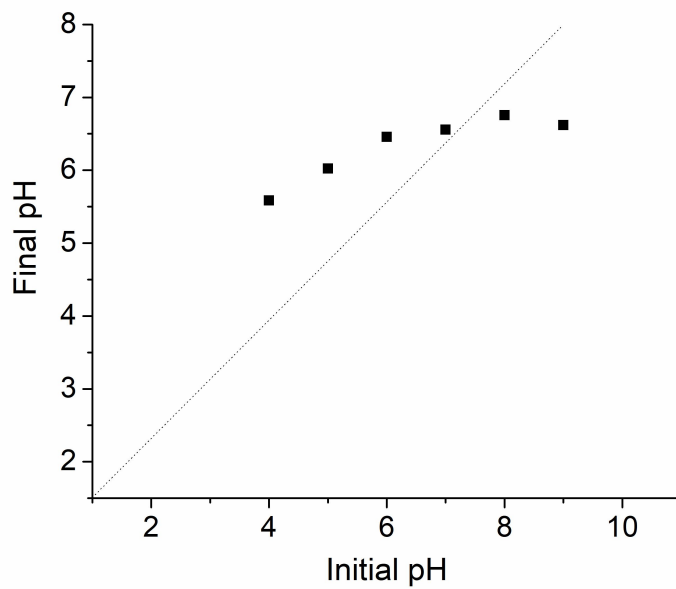

**Figure S1.** Determination of the points of zero charge of HNTs/GO by the pH drift method.

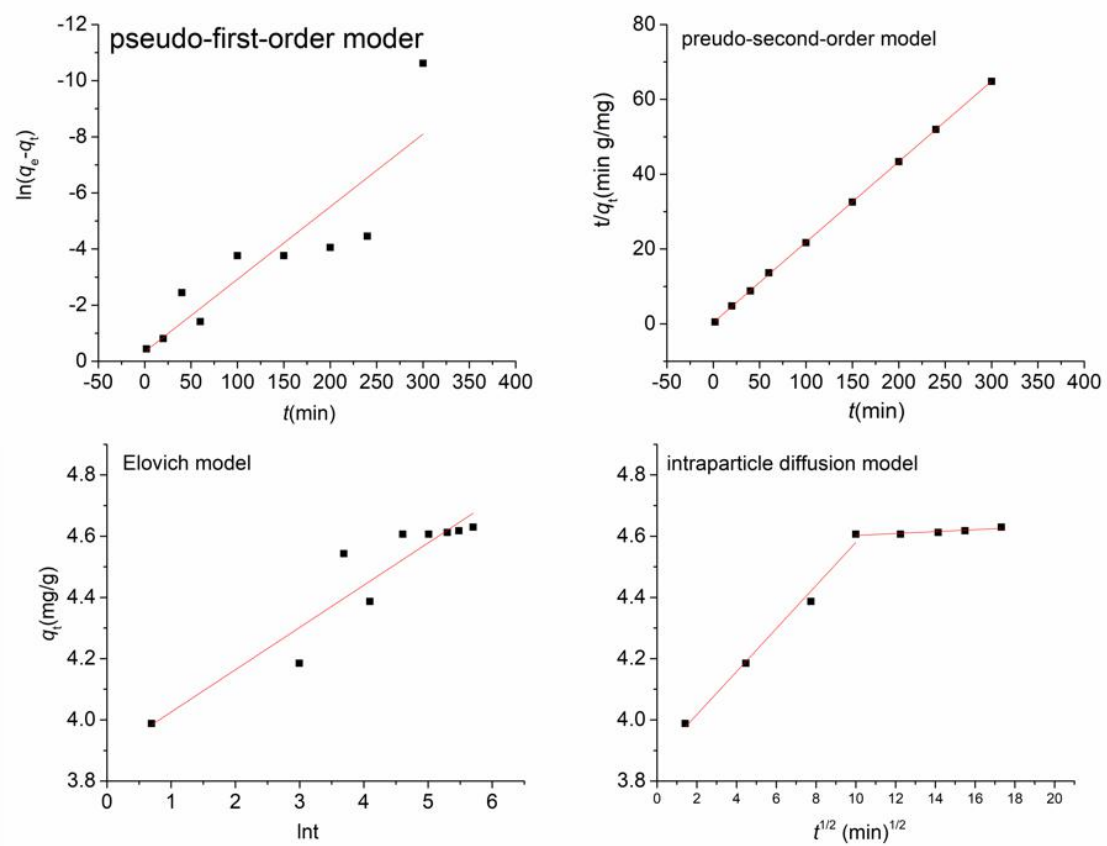

**Figure S2.** The fitting curves of adsorption kinetics for adsorption of LEV onto HNTs/GO.

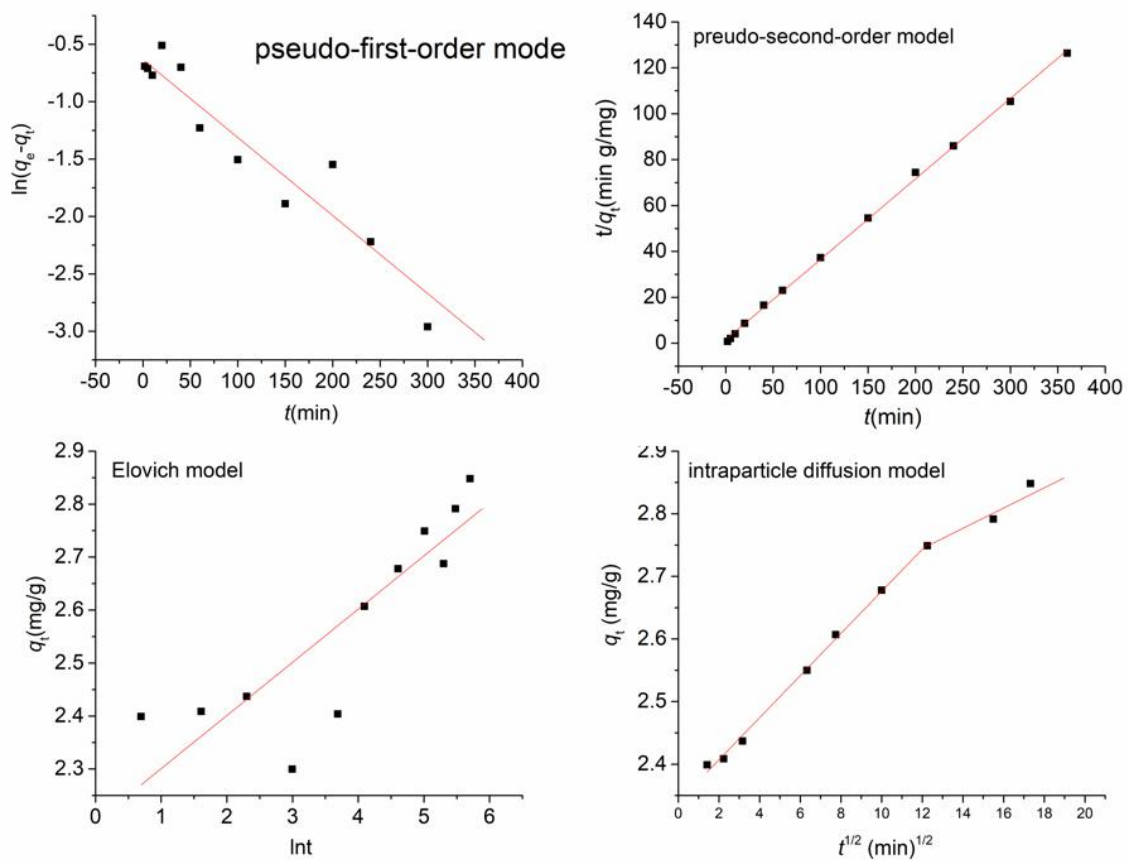

**Figure S3.** The fitting curves of adsorption kinetics for adsorption of CIP onto HNTs/GO.

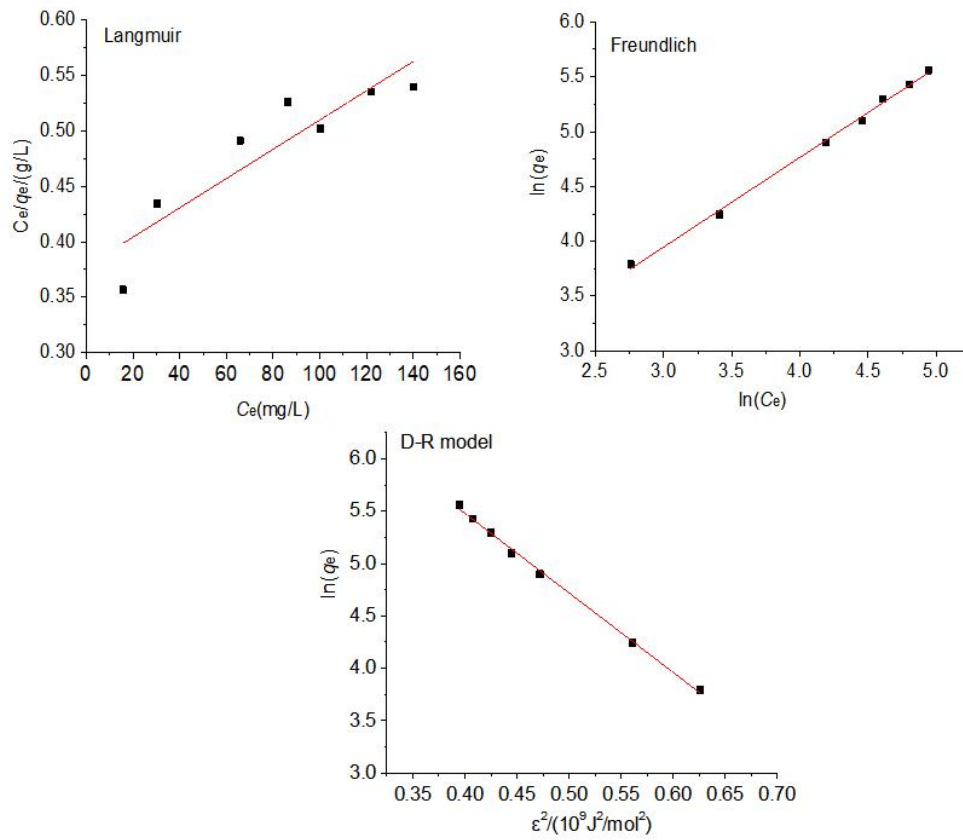

**Figure S4.** The fitting curves of adsorption isotherm for adsorption of LEV onto HNTs/GO.

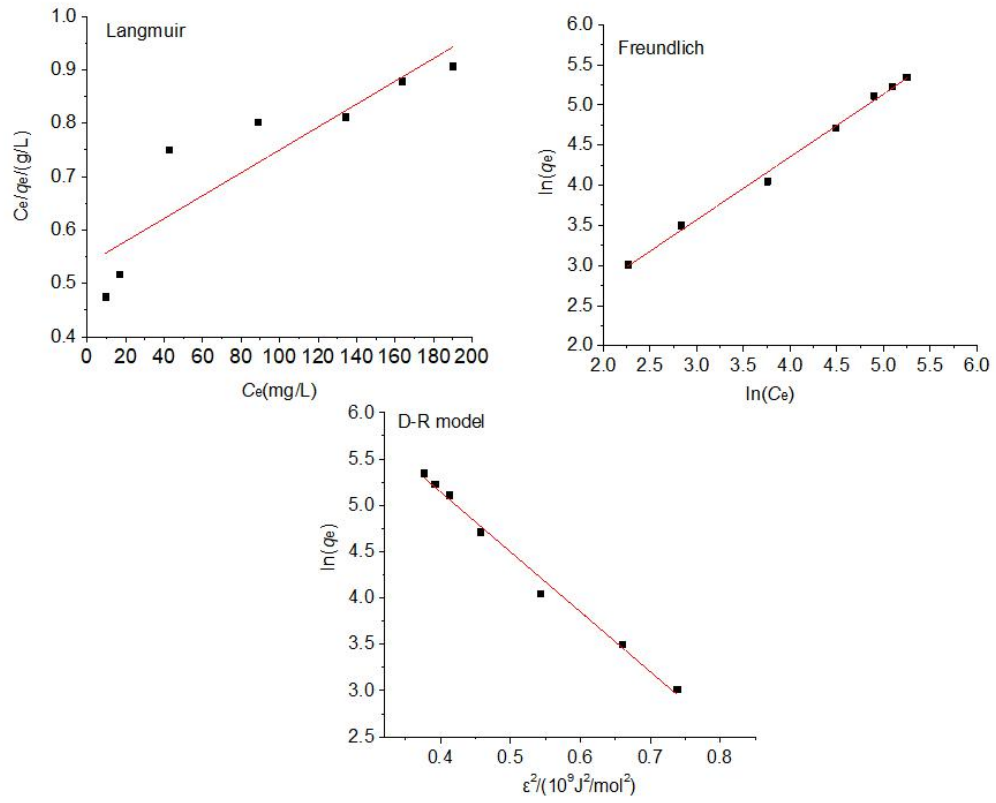

**Figure S5.** The fitting curves of adsorption isotherm for adsorption of CIP onto HNTs/GO.

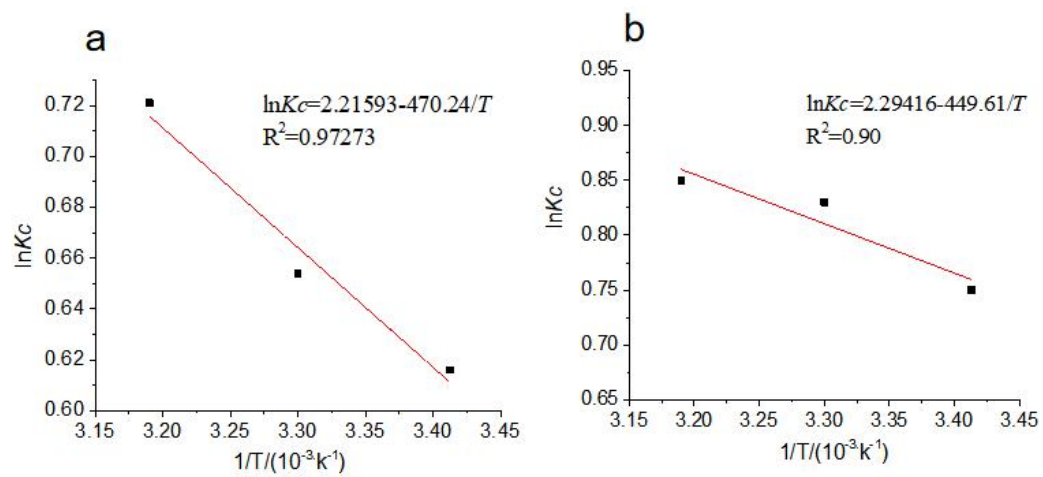

**Figure S6.** A plot of  $\ln(K_c)$  against  $1/T$  for (a) LEV and (b) CIP.

**Table S1.** The strength of the peaks of XPS for HNTs/GO, HNTs/GO-CIP, and HNTs/GO-LEV.

|     | HNTs/GO    |                    | HNTs/GO-CIP |                    | HNTs/GO-LEV |                    |
|-----|------------|--------------------|-------------|--------------------|-------------|--------------------|
|     | Height CPS | Area (P)<br>CPS.eV | Height CPS  | Area (P)<br>CPS.eV | Height CPS  | Area (P)<br>CPS.eV |
| N1s | 1499.48    | 3844.13            | 965.31      | 3456.13            | 908.08      | 2985.3             |
| O1s | 80281.1    | 167849.11          | 68112.85    | 146122.75          | 69130.11    | 149331.76          |
| C1s | 6118.89    | 18244.03           | 5982.32     | 19282.98           | 6065.58     | 19455.94           |
